# Supplementary material for: A unity of opposites in between Nrf1- and Nrf2-mediated responses to the endoplasmic reticulum stressor tunicamycin
Source: bioRxiv or medRxiv preprint supplement (doi:10.1101/655159), 2019-05-31
Supplement: Supplementary file [file media-1.pdf]

## A unity of opposites in between Nrf1- and Nrf2-mediated responses to the endoplasmic reticulum stressor tunicamycin

Yu-ping Zhu<sup>1,§</sup>, Shaofan Hu<sup>1,§</sup>, Xufang Ru<sup>1,§</sup>, Ze Zheng<sup>1</sup>, Zhuo Fan<sup>1</sup>, Lu Qiu<sup>1,2</sup>, and Yiguo Zhang<sup>1\*</sup>

<sup>1</sup>The Laboratory of Cell Biochemistry and Topogenetic Regulation, College of Bioengineering and Faculty of Sciences, Chongqing University, No. 174 Shazheng Street, Shapingba District, Chongqing 400044, China.

<sup>2</sup>Present address: School of Life Sciences, Zhengzhou University, No. 100 Kexue Avenue, Zhengzhou 450001, Henan, China.

<sup>§</sup>Contributed equally to this work.

\*Correspondence should be addressed to Yiguo Zhang (Email: yiguozhang@cqu.edu.cn, or [eaglezhang64@gmail.com](mailto:eaglezhang64@gmail.com))

### Supplementary tables:

**Table S1. ARE and AP1-binding sites in -5 kbp to TSS and also to TIS of ER-stress gene promoters**

| Gene ID | Name      | ARE/EpRE (5'-TGAC/GnnnGC-3')                                                                                                                                                                                                                                                                                                                                                | TRE/AP1 site (5'-TGAC/GTCA-3')                                                          |
|---------|-----------|-----------------------------------------------------------------------------------------------------------------------------------------------------------------------------------------------------------------------------------------------------------------------------------------------------------------------------------------------------------------------------|-----------------------------------------------------------------------------------------|
| 3309    | BIP/GRP78 | TGGC <b>GCAATCTCAGCTC</b> (-4344 to -4328)<br>ATTT <b>TGACCAGGCTGGT</b> (-3811 to -3795)<br>TGGT <b>GCGATCTCAGCTC</b> (-2848 to -2832)<br>TAAG <b>TGACTGTGCTTTG</b> (-2480 to -2464)<br>GAGC <b>TGAGATTGCACTA</b> (-1339 to -1323)                                                                                                                                          | CTCT <b>TGAGTCA</b> CCAG (-2104 to -2090)<br>GTACT <b>TGAGTCA</b> CAGG (-2048 to -2034) |
| 9451    | PERK      | GGTT <b>TGAGTTCGCTCAT</b> (-2728 to -2712)<br>TCTAG <b>CAAAC</b> TCATATA (-1844 to -1828)<br>GCGT <b>GCCAGGTCAGAGT</b> (-719 to -703)<br>CCAAT <b>TGAGAGAGCAAAC</b> (+60 to +76)                                                                                                                                                                                            |                                                                                         |
| 2081    | IRE1      | ACCC <b>GCCACCTCAGCCT</b> (-4079 to -4063)<br>TGAG <b>TGACTTGGCCGTG</b> (-692 to -676)<br>AGTCT <b>TGACGCGGCAGGT</b> (-370 to -354)<br>TGAG <b>GCTCGGTCA</b> CCGC (+26 to +42)                                                                                                                                                                                              |                                                                                         |
| 22926   | ATF6      | TCTT <b>GCTCTGTCA</b> CCCA (-3459 to -3443)<br>GAGCT <b>TGAGATGGCTCCA</b> (-2054 to -2038)<br>GTTCT <b>TGAGATAGCCACG</b> (-343 to -327)                                                                                                                                                                                                                                     |                                                                                         |
| 1649    | CHOP      | CACAG <b>CTTGGTCA</b> TGTC (-4521 to -4505)<br>AAGGG <b>CTACCTCAGTCA</b> (-4384 to -4368)<br>AGGC <b>GCCCTGTCA</b> CCCA (-2780 to -2764)<br>TCTC <b>GCTCTGTCA</b> CCCA (-935 to -919)<br>AAGCT <b>TGAGTTGGCCAGG</b> (+2219 to +2235)                                                                                                                                        | CGCAT <b>TGACTCA</b> CCCA (-242 to -228)                                                |
| 7494    | XBP1      | TCCC <b>TGACCGAGCTGGT</b> (-4419 to -4403)<br>CACT <b>GCAGCCTCAATCT</b> (-4205 to -4189)<br>CTCAG <b>CCTCCTCAGTAG</b> (-3987 to -3971)<br>ATGT <b>TGACCAGGCTGGT</b> (-3901 to -3885)<br>CTGT <b>TGACCAGGCTGGA</b> (-2943 to -2927)<br>CTGG <b>TGACAGAGCCTGA</b> (-869 to -853)<br>AAAT <b>GCACGCTCATAGT</b> (-701 to -685)                                                  | GGCAT <b>TGAGTCA</b> CCGT (-4306 to -4292)                                              |
| 468     | ATF4      | CTGC <b>TGAGATTGCAGTA</b> (-4933 to -4917)<br>ATCT <b>TGAGAGAGCTCAT</b> (-4449 to -4433)<br>ACCA <b>TGACTGGGCAAGC</b> (-3612 to -3596)<br>TTGC <b>TGACTGTGCTCCC</b> (-3105 to -3089)<br>GGACT <b>TGACTTGGCTGAG</b> (-2940 to -2924)<br>ATTT <b>GCACAGTCATCTG</b> (-2230 to -2214)<br>CCTC <b>TGAGGCAGCAGGA</b> (-1788 to -1773)<br>CCAT <b>GCAGACTCAGCCG</b> (-893 to -877) | GGCG <b>TGAGTCA</b> AGGG (+513 to +527)                                                 |

Note: TSS, transcriptional start signal and TIS, translation initiation signal.

**Table S2. The primer pairs used for qRT-PCR analysis**

| <b>Name</b>    | <b>Forward primer (5' to 3')</b> | <b>Reverse primer (5' to 3')</b> |
|----------------|----------------------------------|----------------------------------|
| <b>β-actin</b> | <b>CATGTACGTTGCTATCCAGGC</b>     | <b>CTCCTTAATGTCACGCACGAT</b>     |
| <b>Nrf1</b>    | <b>GCTGGACACCATCCTGAATC</b>      | <b>CCTTCTGCTTCATCTGTGCG</b>      |
| <b>Nrf2</b>    | <b>TCAGCGACGGAAAGAGTATGA</b>     | <b>CCACTGGTTTCTGACTGGATGT</b>    |
| <b>GCLM</b>    | <b>GTGTGATGCCACCAGATTTGAC</b>    | <b>CACAATGACCGAATACCGCAGT</b>    |
| <b>HO-1</b>    | <b>CAGAGCCTGGAAGACACCCTAA</b>    | <b>AAACCACCCCAACCCTGCTAT</b>     |
| <b>Chop</b>    | <b>GGAAACAGAGTGGTCATTCCC</b>     | <b>CTGCTTGAGCCGTTCAATTCTC</b>    |
| <b>Bip</b>     | <b>GAACGTCTGATTGGCGATGC</b>      | <b>ACCACCTTGAACGGCAAGAA</b>      |
| <b>ATF6</b>    | <b>AGCAGCACCCAAGACTCAAAC</b>     | <b>GCATAAGCGTTGGTACTGTCTGA</b>   |
| <b>ATF4</b>    | <b>CCCTTCACCTTCTTACAACCTC</b>    | <b>TGCCCAGCTCTAAACTAAAGGA</b>    |
| <b>XBP1</b>    | <b>CCCTCCAGAACATCTCCCCAT</b>     | <b>ACATGACTGGGTCCAAGTTGT</b>     |
| <b>IRE1</b>    | <b>GAGACCCTGCGCTATCTGAC</b>      | <b>CTTGGCCTCTGTCTCCTTGG</b>      |
| <b>PERK</b>    | <b>CTTCCAGTGGGACCAAGACC</b>      | <b>CGAGGTCCGACAGCTCTAAC</b>      |
| <b>PSMB6</b>   | <b>TCAAGAAGGAGGGCAGGTGT</b>      | <b>GTAAGTGGCAACGGCGAA</b>        |
| <b>PSMA1</b>   | <b>ATTCATCAAATTGAATATGCAAT</b>   | <b>CTCTGATTGCGCCCTTTTCAA</b>     |
| <b>PSMA4</b>   | <b>TTGCTGTACATTGGCTGGGA</b>      | <b>ACACAGCTGCAGCGCTATTA</b>      |
| <b>PSMA7</b>   | <b>TACATCACCCGCTACATCGC</b>      | <b>AGAGCCTAGGAGTGCCATCA</b>      |
| <b>PSMB7</b>   | <b>CTGTGTGCGGTGTATGCTCCA</b>     | <b>TGCCAGTTTTCCGGACCTTT</b>      |
| <b>PSMC1</b>   | <b>ACAAGGTGCATGCCGTGATA</b>      | <b>CTGTGCCAGGTGGACCATAG</b>      |
